# Supplementary material for: Synthesis and evaluation of potential CT (computer tomography) contrast agents for bone structure and microdamage analysis
Source: Royal Society of Chemistry journal article supplement (doi:10.1039/b606976b), 2006-01-01

# Synthesis and evaluation of novel CT (Computer Tomography) contrast agents for bone structure and microdamage analysis

Raman Parkesh,<sup>a,b</sup> Wolfgang Gowin,<sup>c</sup> T. Clive Lee<sup>b</sup> and Thorfinnur Gunnlaugsson<sup>a\*</sup>

<sup>a</sup> School of Chemistry, Centre for Synthesis and Chemical Biology (CSCB), Trinity College Dublin, Dublin 2, Ireland. Fax: 00 353 1 671 2826; Tel: 00 353 1 608 3459; E-mail: gunnlaut@tcd.ie

<sup>b</sup> Department of Anatomy, Royal College of Surgeons in Ireland, St. Stephen's Green, Dublin 2, Ireland.

<sup>c</sup> Center of Muscle and Bone Research, Department of Radiology and Nuclear Medicine, Charité-University Medicine Berlin, Campus Benjamin Franklin, Berlin, Germany

*This submission was created using the RSC Article Template (DO NOT DELETE THIS TEXT) (LINE INCLUDED FOR SPACING ONLY - DO NOT DELETE THIS TEXT)*

## Electronic Supplementary Information

Figure 1. <sup>1</sup>H (400 MHz, D<sub>2</sub>O) NMR of 1

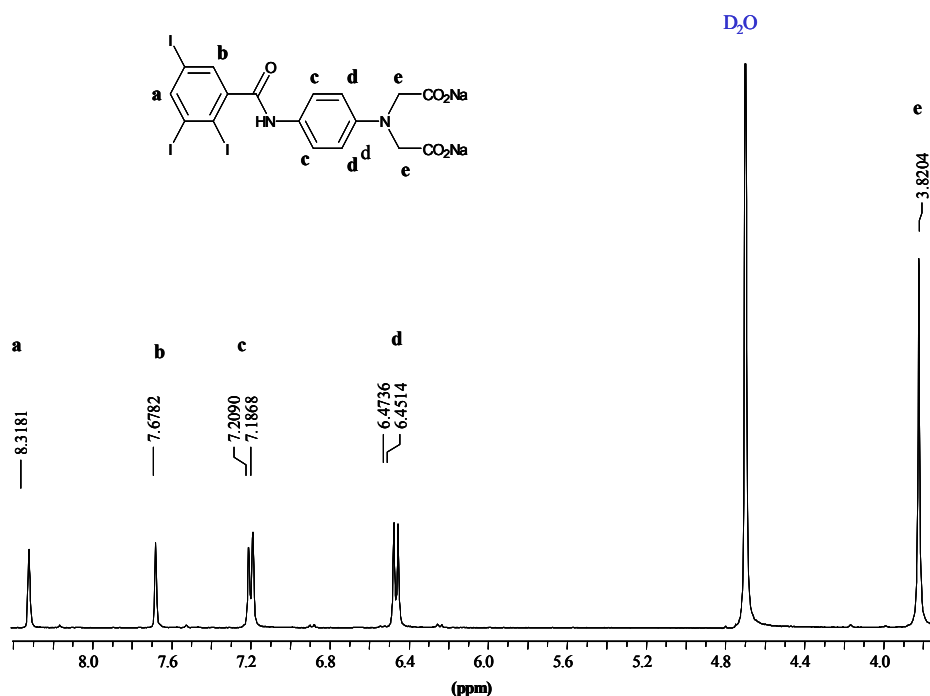

Figure 2.  $^1\text{H}$  (400 MHz,  $\text{D}_2\text{O}$ ) NMR of 2

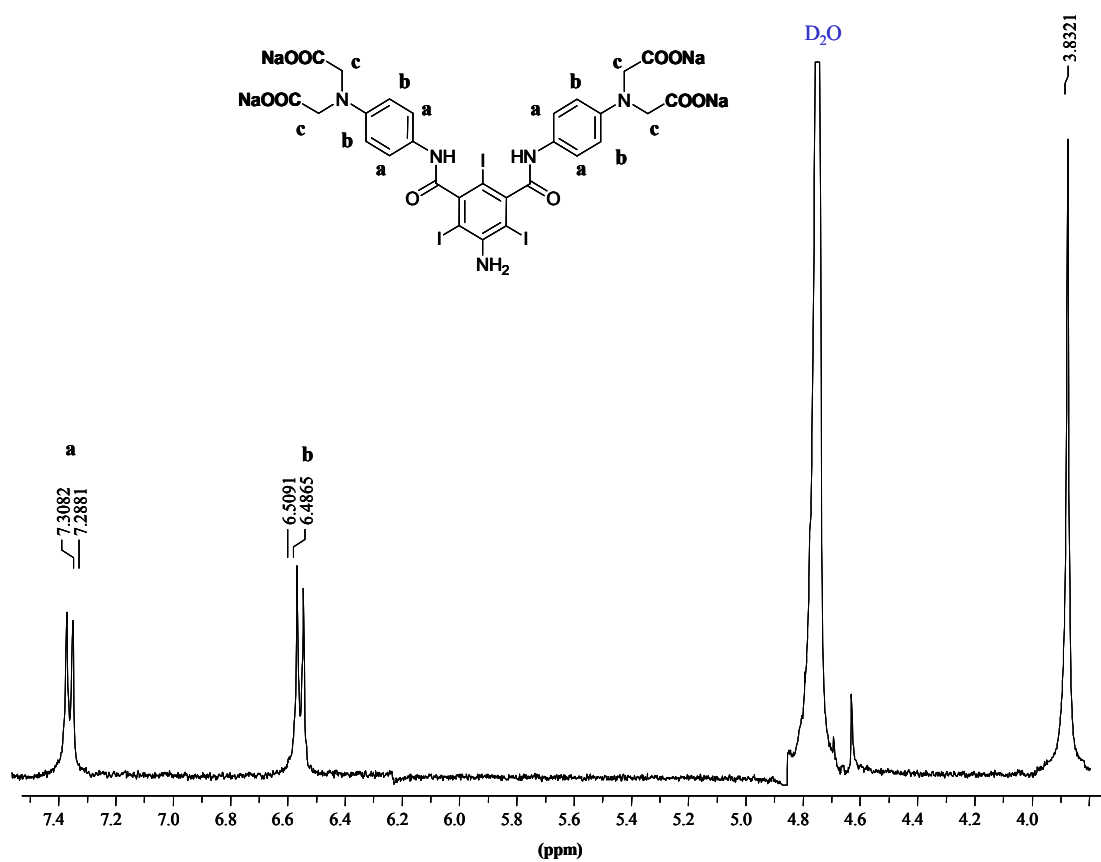

Figure 3.  $^1\text{H}$  (400 MHz,  $\text{D}_2\text{O}$ ) NMR of 3

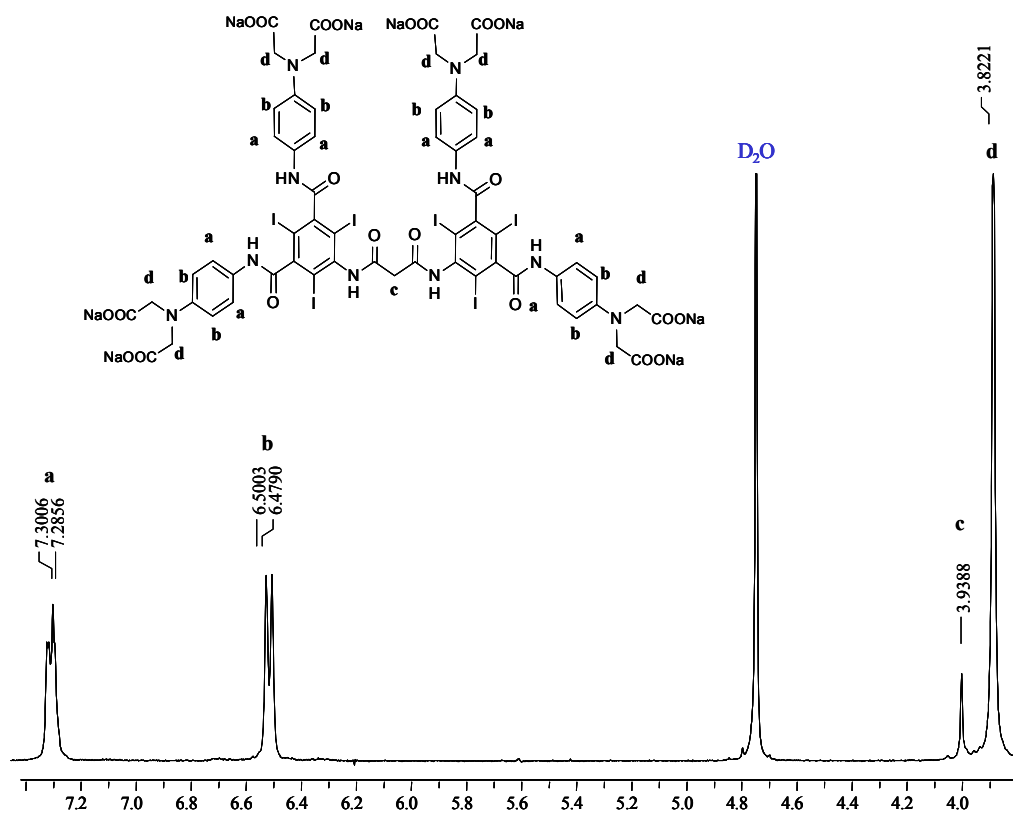

Supplement: b606976b.pdf [file b606976b.pdf]
